# Supplementary material for: Mapping the Key Residues within the Porcine Reproductive and Respiratory Syndrome Virus nsp1α Replicase Protein Required for Degradation of Swine Leukocyte Antigen Class I Molecules
Source: Viruses. 2022 Mar 26;14(4):690. doi: 10.3390/v14040690 (PMC9030574; doi:10.3390/v14040690)
Supplement: Supplementary file 1 [file viruses-14-00690-s001.zip › Table S1.pdf]

**Table S1. Effect on SLA-I-HC degradation of the nsp1 $\alpha$  mutants with 2-6 alanine substitutions by Western blot.**

| Mutants | Induction of SLA-I-HC degradation | Further mutation |
|---------|-----------------------------------|------------------|
| S2-5A   | +                                 | No               |
| P12-6A  | -                                 | Yes              |
| V18-6A  | -                                 | Yes              |
| S30-5A  | +                                 | No               |
| L35-5A  | +                                 | No               |
| Q40-5A  | -                                 | Yes              |
| G45-5A  | +                                 | No               |
| F50-5A  | -                                 | Yes              |
| E55-5A  | +                                 | No               |
| T60-4A  | +                                 | No               |
| F65-4A  | +                                 | No               |
| P72-3A  | +                                 | No               |
| L78-5A  | -                                 | Yes              |
| P83-5A  | -                                 | Yes              |
| T88-5A  | -                                 | Yes              |
| N93-5A  | -                                 | Yes              |
| M98-4A  | +                                 | No               |
| E104-4A | +                                 | No               |
| G109-5A | -                                 | Yes              |
| T114-5A | +                                 | No               |
| L119-5A | +                                 | No               |
| R124-5A | +                                 | No               |
| Y129-5A | +                                 | No               |
| P134-4A | +                                 | No               |
| V138-4A | -                                 | Yes              |
| N143-2A | +                                 | No               |
| S148-4A | +                                 | No               |
| F152-3A | +                                 | No               |
| T156-5A | -                                 | Yes              |
| N161-5A | -                                 | Yes              |
| Q166-5A | +                                 | No               |
| E171-5A | +                                 | No               |
| F176-5A | +                                 | No               |
