# Supplementary material for: Mapping the Key Residues within the Porcine Reproductive and Respiratory Syndrome Virus nsp1α Replicase Protein Required for Degradation of Swine Leukocyte Antigen Class I Molecules
Source: Viruses. 2022 Mar 26;14(4):690. doi: 10.3390/v14040690 (PMC9030574; doi:10.3390/v14040690)
Supplement: Supplementary file 1 [file viruses-14-00690-s001.zip › Table S2.pdf]

**Table S2. Effect on SLA-I-HC degradation of the nsp1 $\alpha$  mutants with 1-3 alanine substitutions by Western blot.**

| Mutants | Induction of SLA-I-HC degradation | Further mutation |
|---------|-----------------------------------|------------------|
| P12-2A  | +                                 | No               |
| R15-3A  | -                                 | Yes              |
| V18A    | +                                 | No               |
| E20-3A  | +                                 | No               |
| Q22-2A  | +                                 | No               |
| Q40-3A  | +                                 | No               |
| E43-2A  | +                                 | No               |
| F50-2A  | -                                 | Yes              |
| R52-3A  | +                                 | No               |
| L78-2A  | +                                 | No               |
| I81-2A  | -                                 | Yes              |
| P83-2A  | +                                 | No               |
| R86-2A  | -                                 | Yes              |
| T88-2A  | -                                 | Yes              |
| G90-2A  | -                                 | Yes              |
| L92-2A  | +                                 | No               |
| F94-2A  | -                                 | Yes              |
| Q96-2A  | -                                 | Yes              |
| G109-2A | +                                 | No               |
| T111-2A | +                                 | No               |
| P113A   | +                                 | No               |
| V138-2A | +                                 | No               |
| Y140-2A | +                                 | No               |
| T156-2A | +                                 | No               |
| V158-3A | -                                 | Yes              |
| N161-2A | -                                 | Yes              |
| P163-3A | +                                 | No               |
