# Supplementary material for: Mapping the Key Residues within the Porcine Reproductive and Respiratory Syndrome Virus nsp1α Replicase Protein Required for Degradation of Swine Leukocyte Antigen Class I Molecules
Source: Viruses. 2022 Mar 26;14(4):690. doi: 10.3390/v14040690 (PMC9030574; doi:10.3390/v14040690)
Supplement: Supplementary file 1 [file viruses-14-00690-s001.zip › Table S3.pdf]

**Table S3. Mutational effect of the nsp1 $\alpha$  substitutions on viral viability by reverse genetics.**

| Mutants | CPE | Anti-N<br>immunofluorescence | Virus viability |
|---------|-----|------------------------------|-----------------|
| F17A    | -   | -                            | No              |
| I81A    | -   | -                            | No              |
| F82A    | -   | -                            | No              |
| R86A    | -   | -                            | No              |
| T88A    | -   | -                            | No              |
| G90A    | +   | +                            | Yes             |
| N91A    | -   | -                            | No              |
| F94A    | -   | -                            | No              |
| R97A    | -   | -                            | No              |
| T160A   | +   | +                            | Yes             |
| N16A    | -   | -                            | No              |
